# Supplementary material
Source: PubMed Central journal article supplement (PMC6493188)
Supplement: CNS-20-961-s001.pdf [file CNS-20-961-s001.pdf]

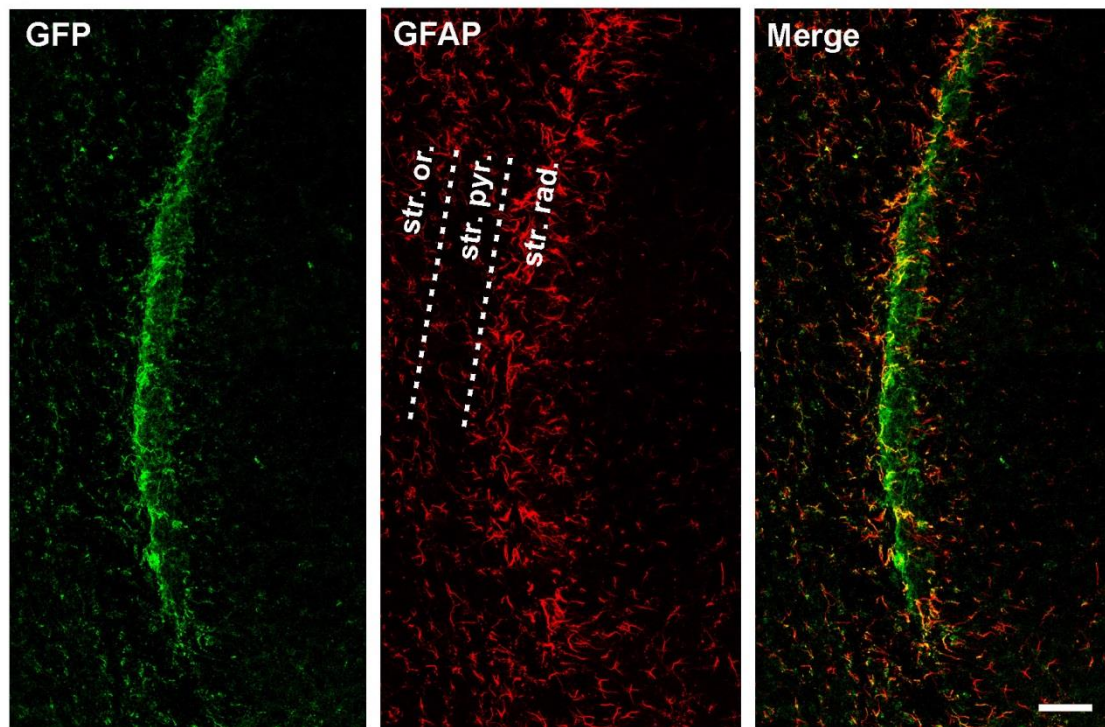

**Figure S1** Area of transgene expression of GFP driven by a lentiviral vector in the hippocampus of 3xTgAD mice. GFP in transduced astrocytes of the dorsal CA1 hippocampus was confirmed by co-localization with the astrocyte marker GFAP in the merge images for GFP plus GFAP. Representative confocal image of double immunohistochemistry. Abbreviations: str. or., stratum oriens; str. pyr., stratum pyramidale; str. rad., stratum radiatum. Scale bar = 100  $\mu$ m.

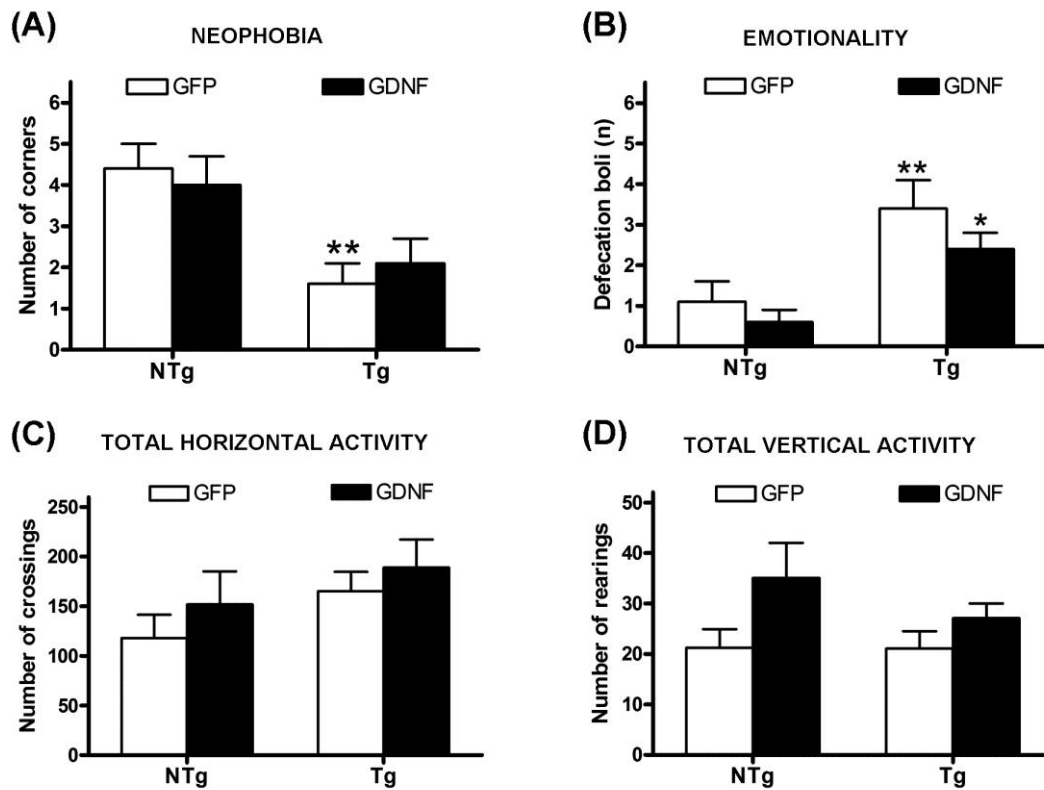

**Figure S2** Behavior of 3xTgAD mice (Tg) and non-transgenic mice (NTg) treated with GFP or GDNF. (A) Neophobia measured by a reduction of the number of corners in the Corner test. (B) Emotionality measured by increased number of defecation boli in the Open field test. (C) Horizontal activity and (D) vertical activity in the Open field test. General non-cognitive behavior was weakly modified by GDNF. Values are the mean  $\pm$  SEM, n=8-9. Statistics: \* $p < 0.05$  and \*\* $p < 0.01$  compared to the corresponding treatment of NTg mice, by Bonferroni test.
